# Supplementary material for: Endothelial cells induce cancer stem cell features in differentiated glioblastoma cells via bFGF
Source: PubMed Central journal article supplement (PMC4539660; doi:10.1186/s12943-015-0420-3), 2015-08-19

**Figure S2**

**A**

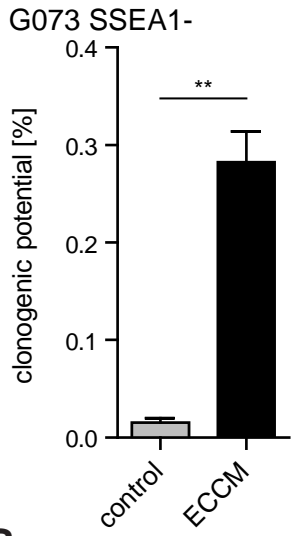

**B**

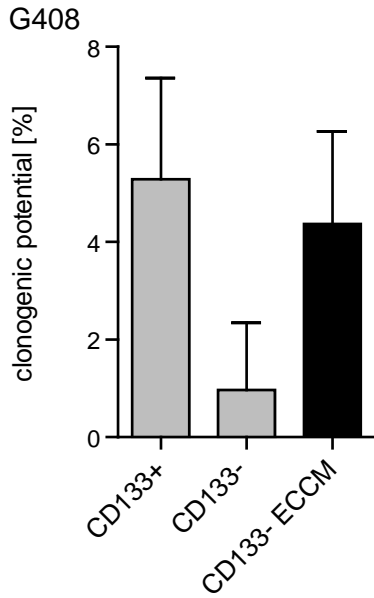

**C**

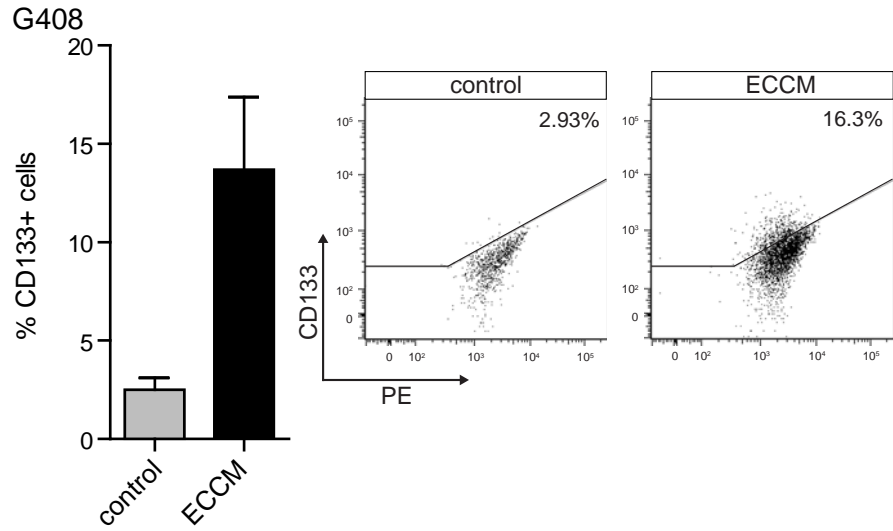

**D**

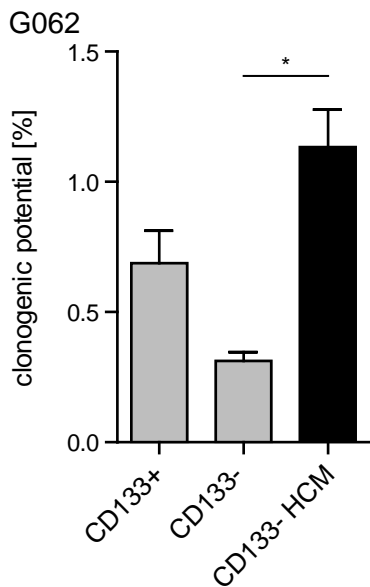

**E**

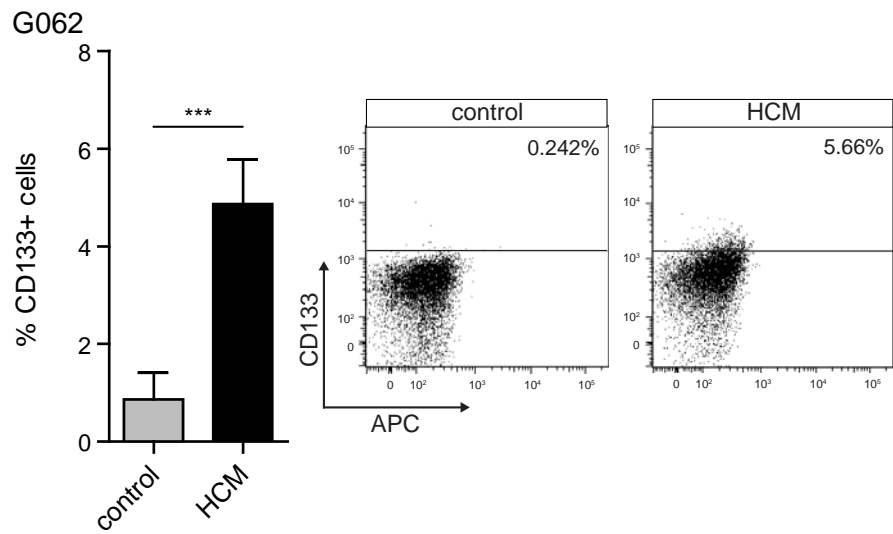

**Figure S3**

**A**

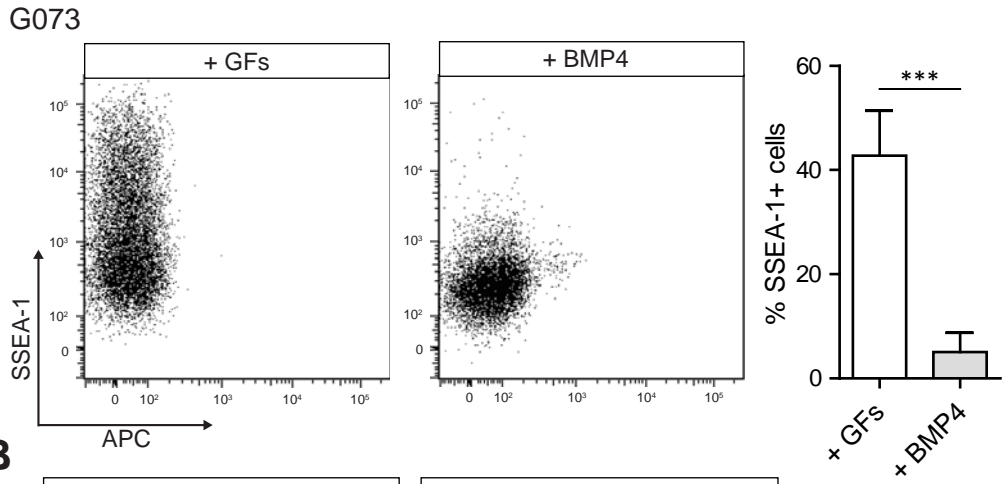

**B**

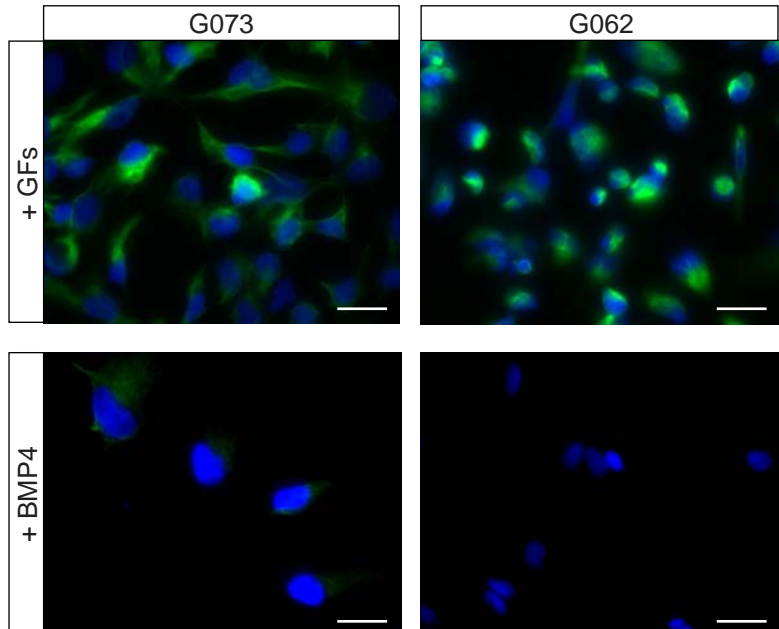

**C**

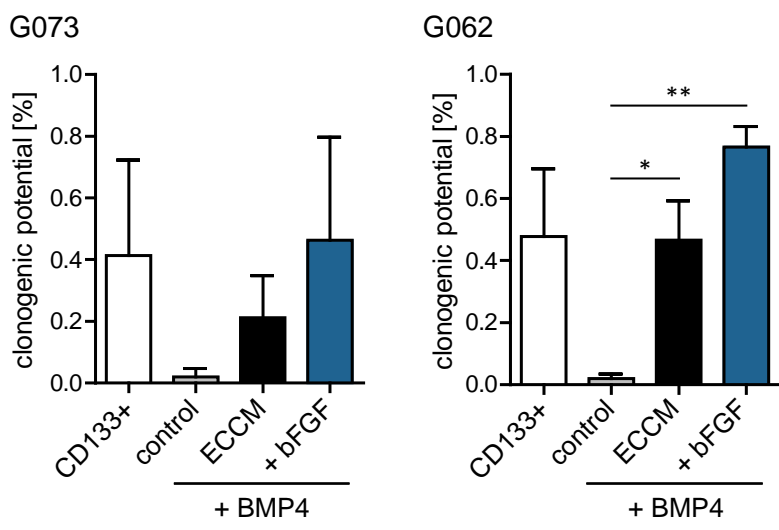

**D**

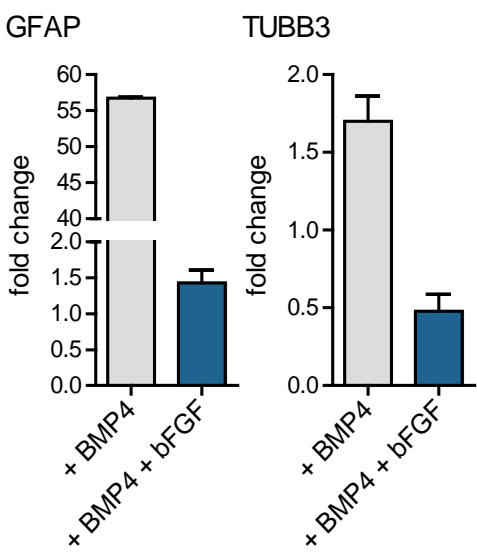

**Figure S4**

**A**

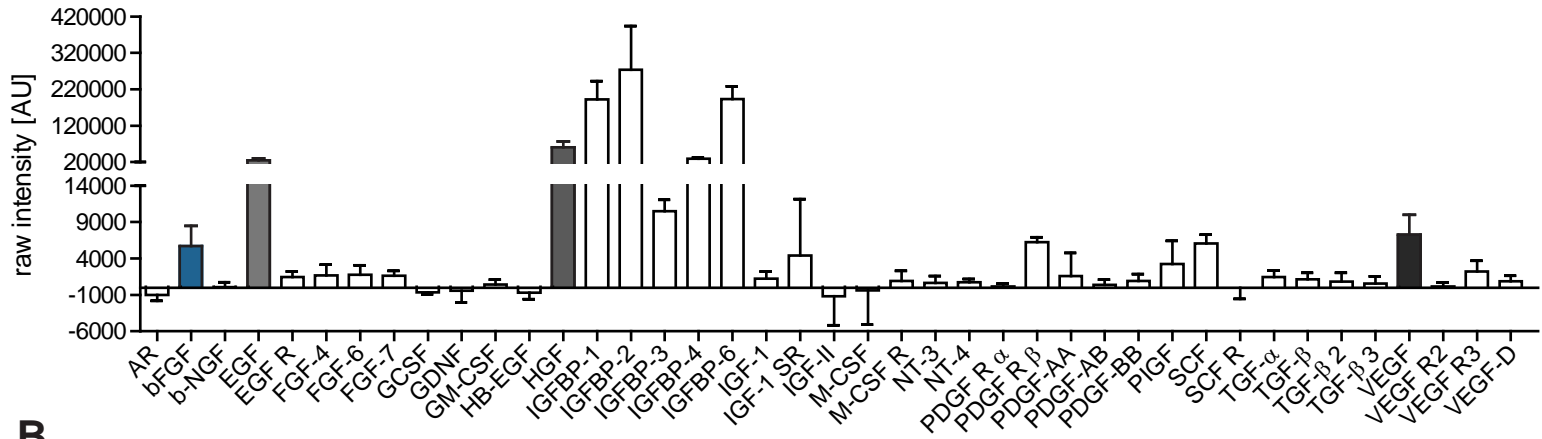

**B**

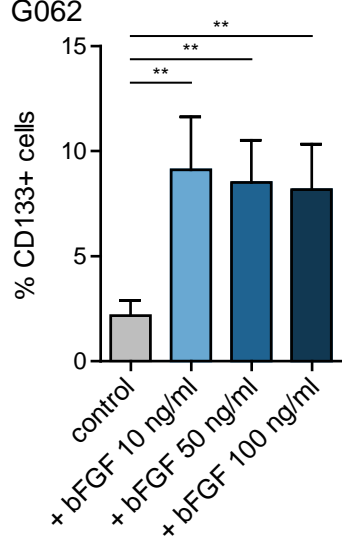

# Figure S5

## A

parental

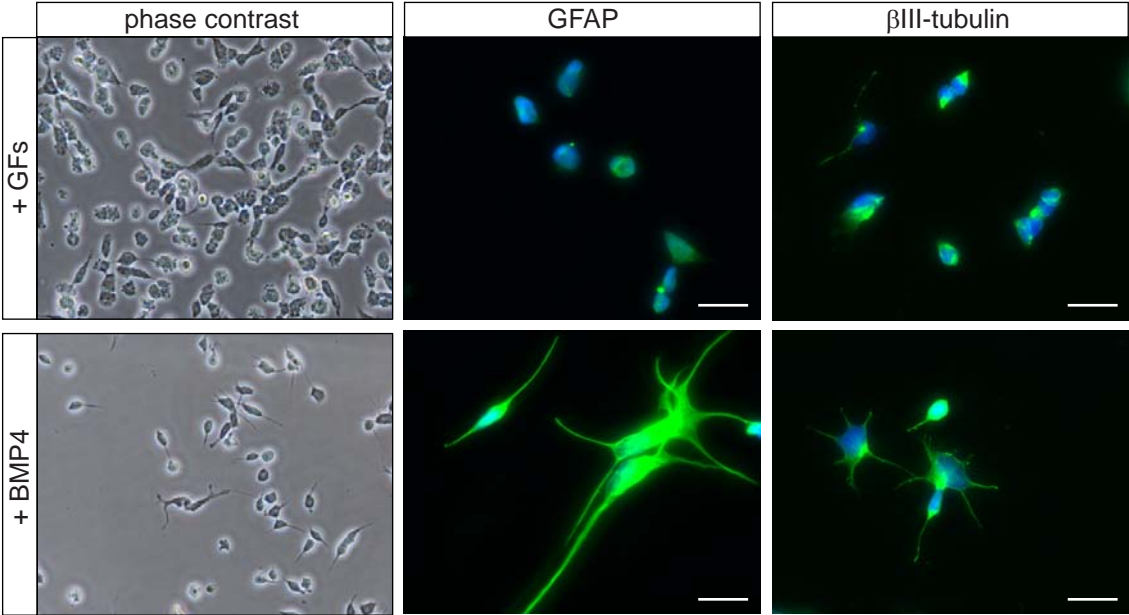

## B

bFGF-reverted

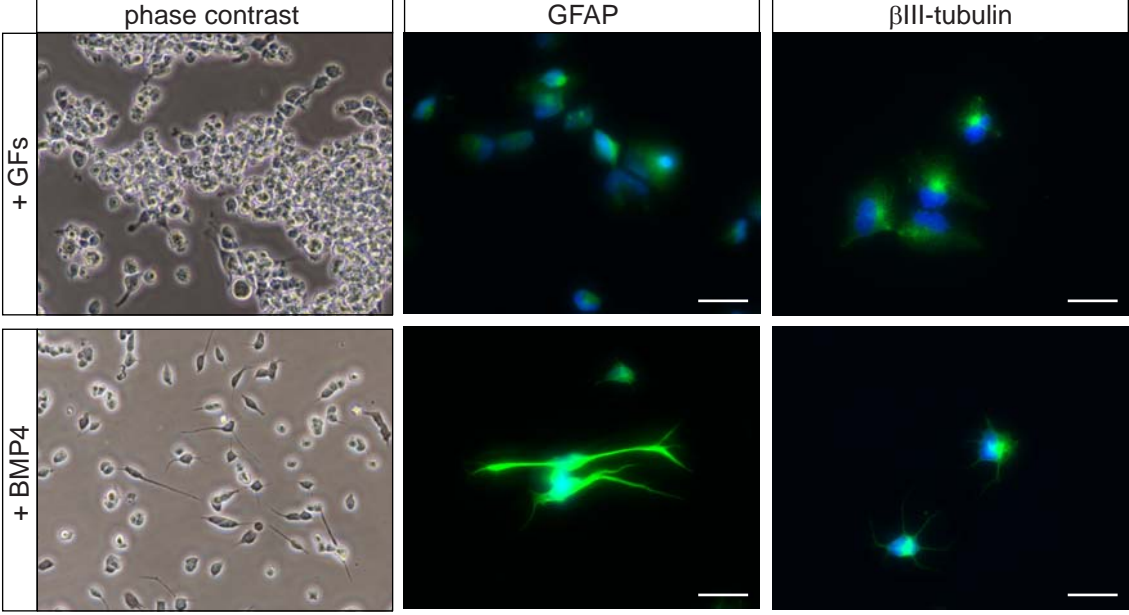

**Figure S6**

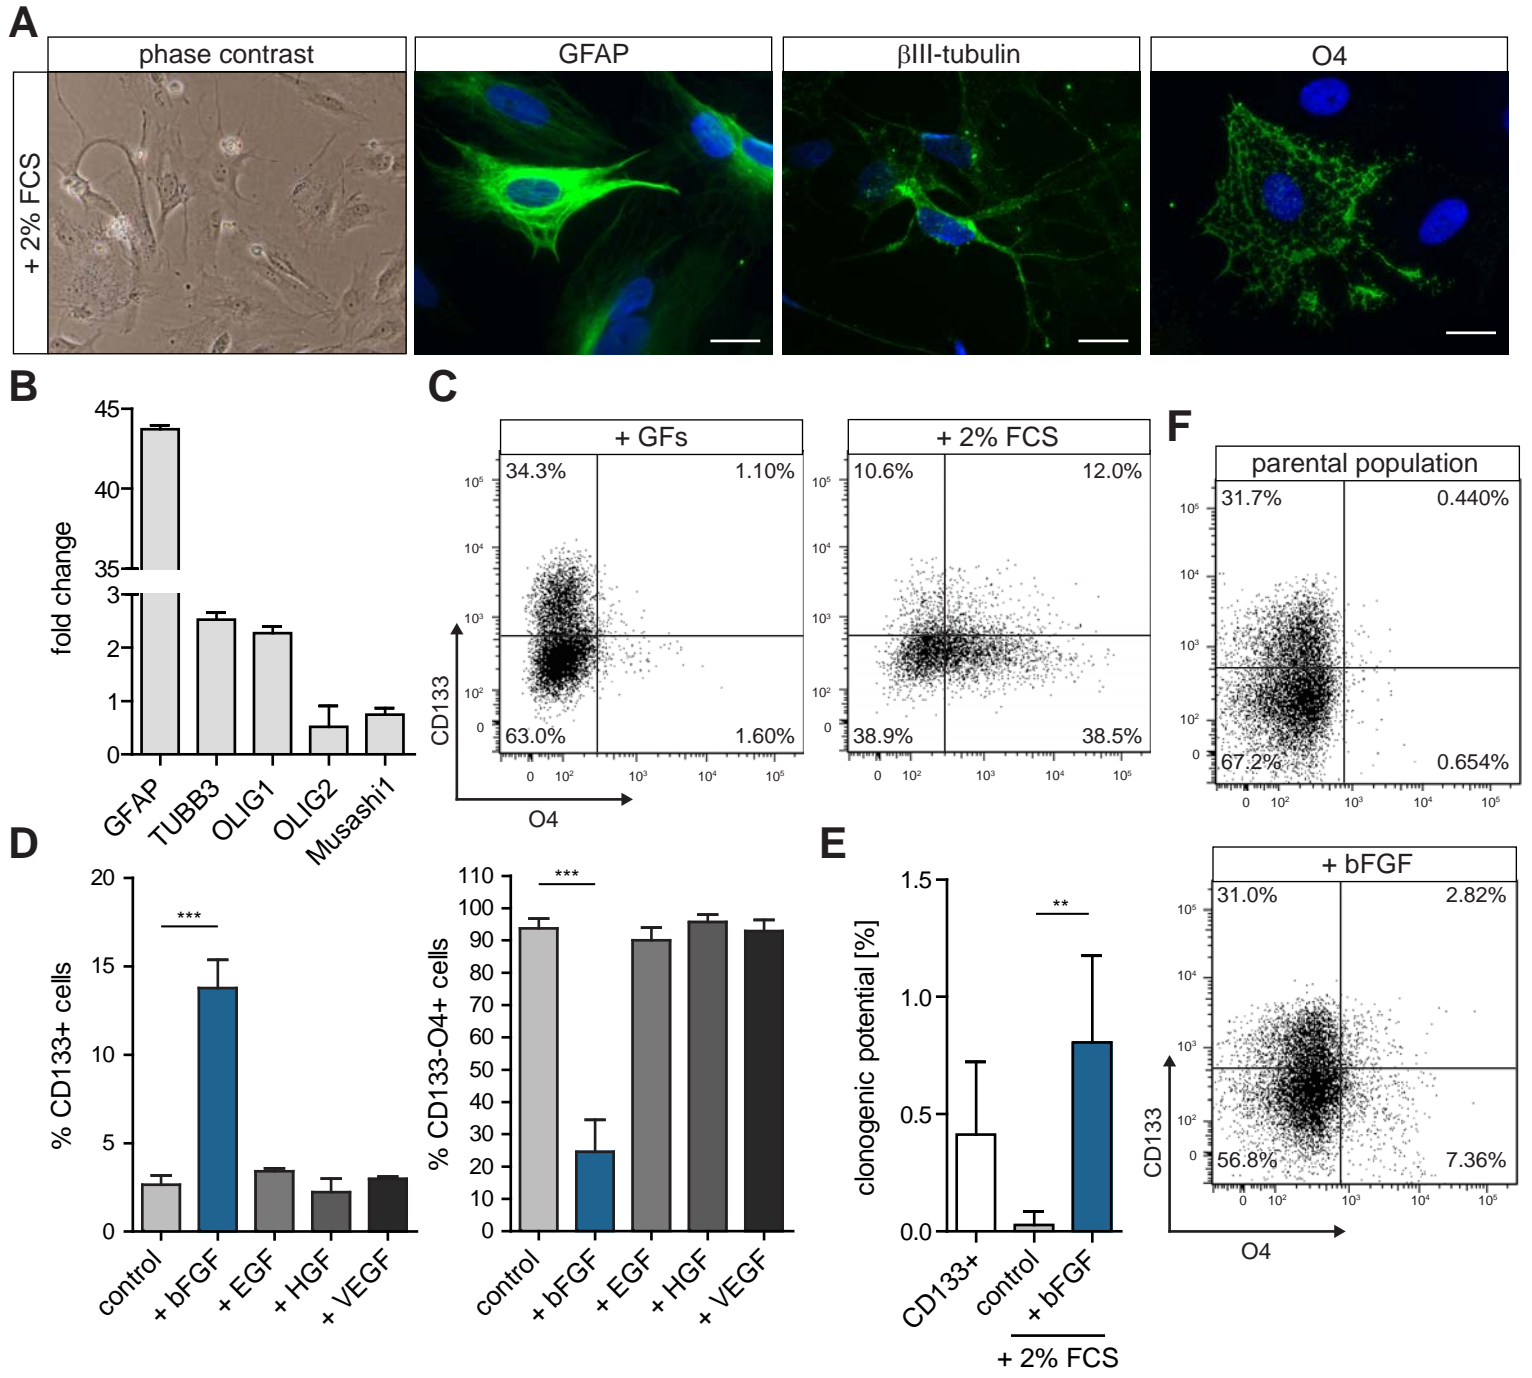

# Figure S7

G073

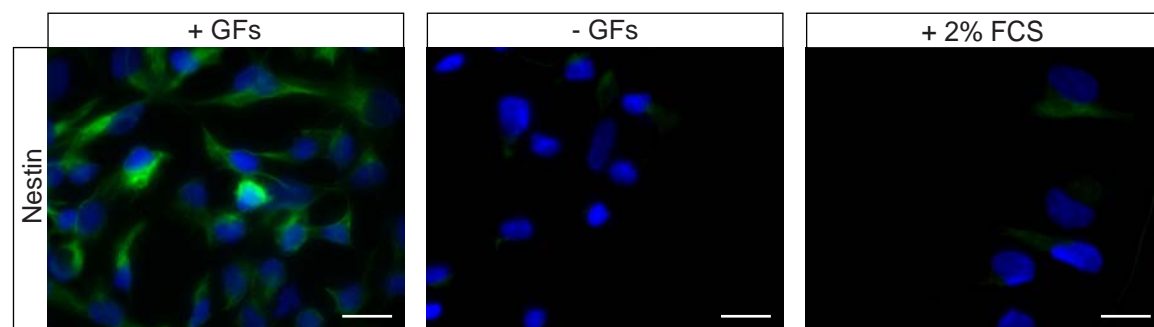

**Figure S8**

**A**

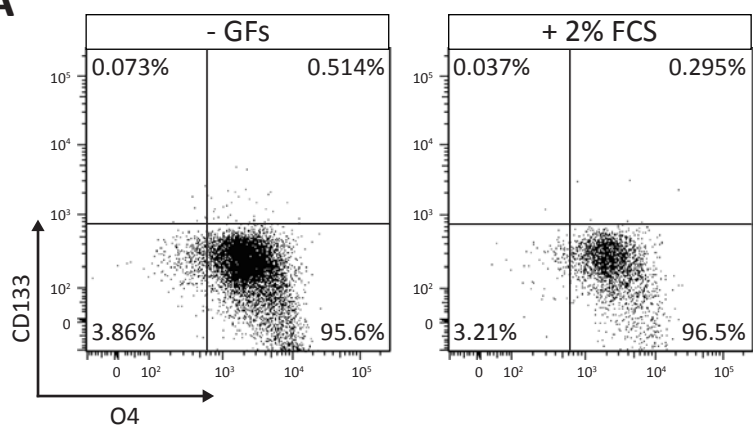

**B**

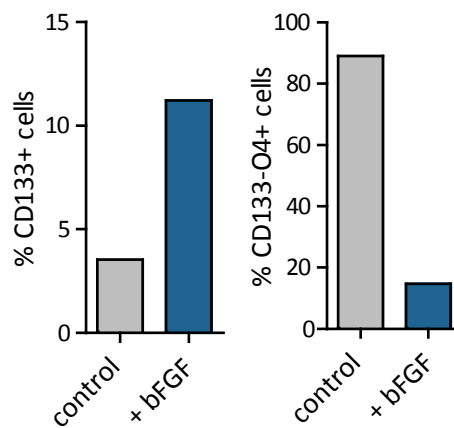

**Figure S9**

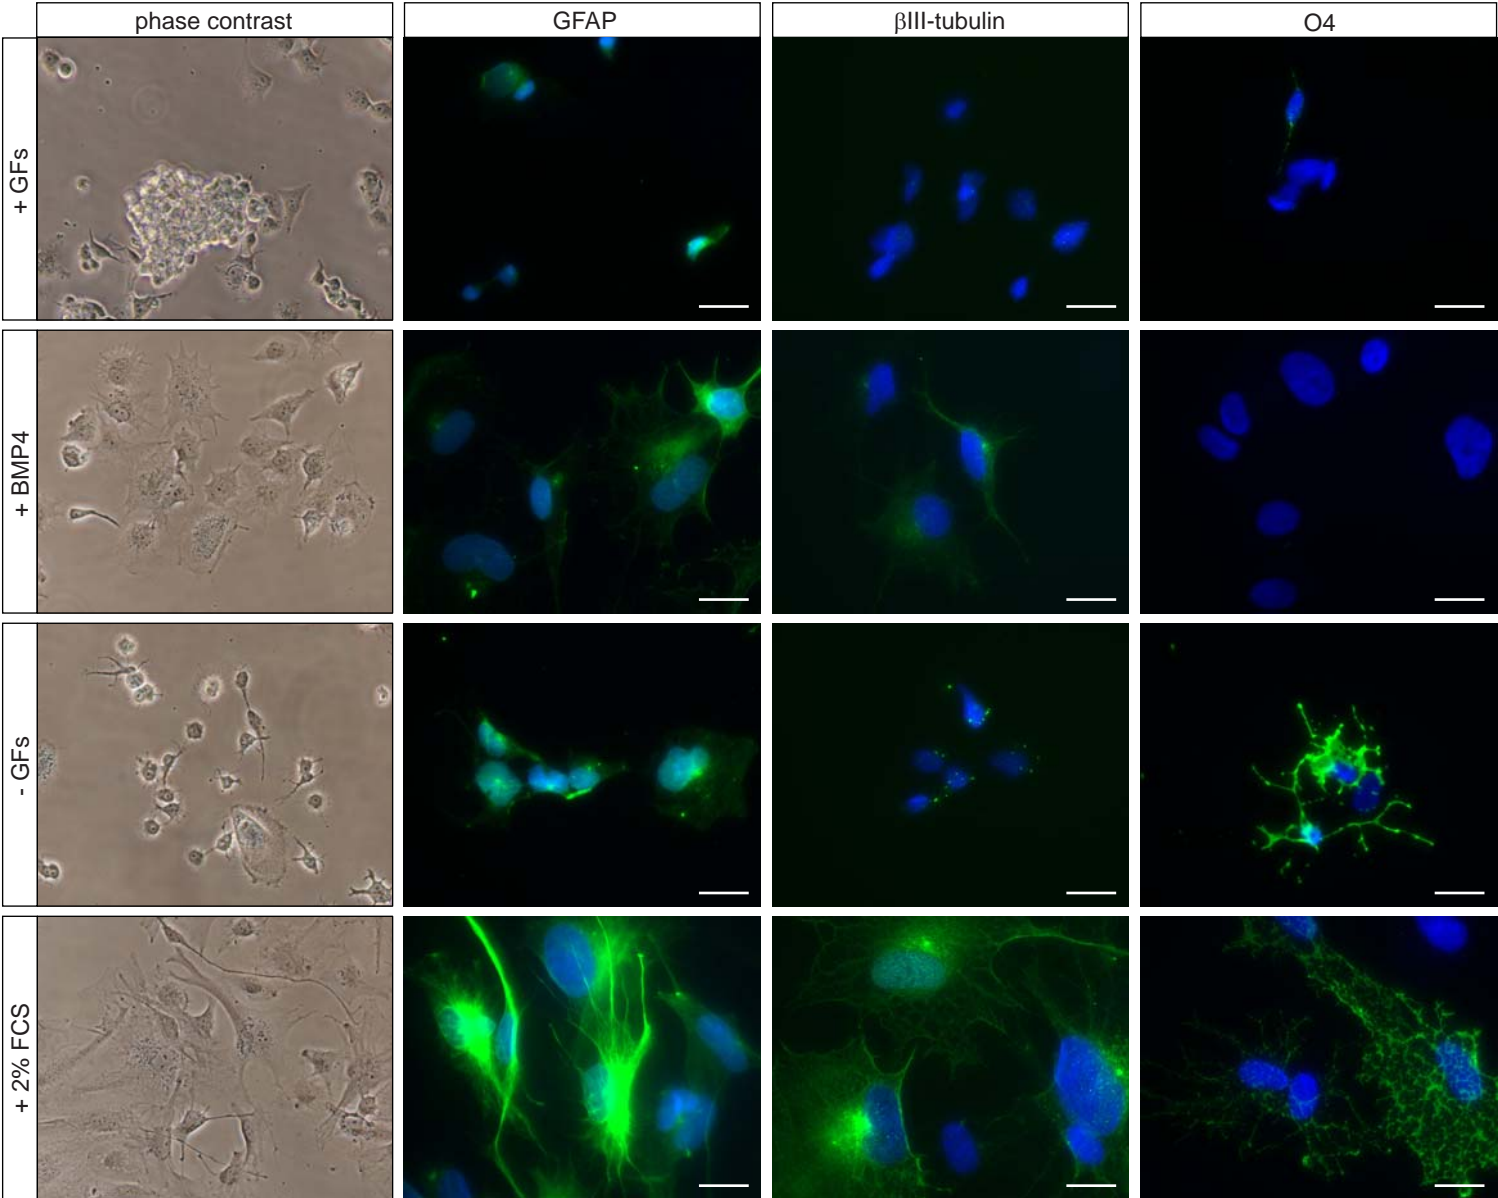



**Figure S10**

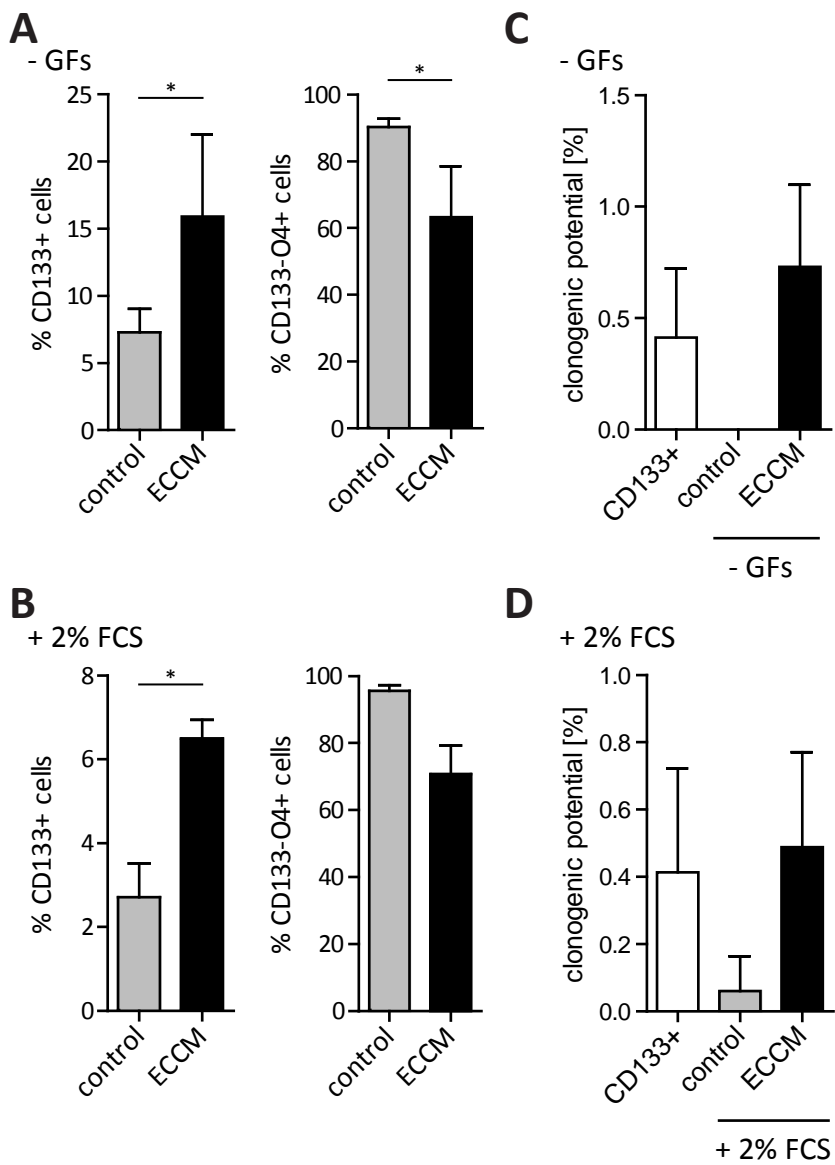

**Figure S1**

**A**

G073

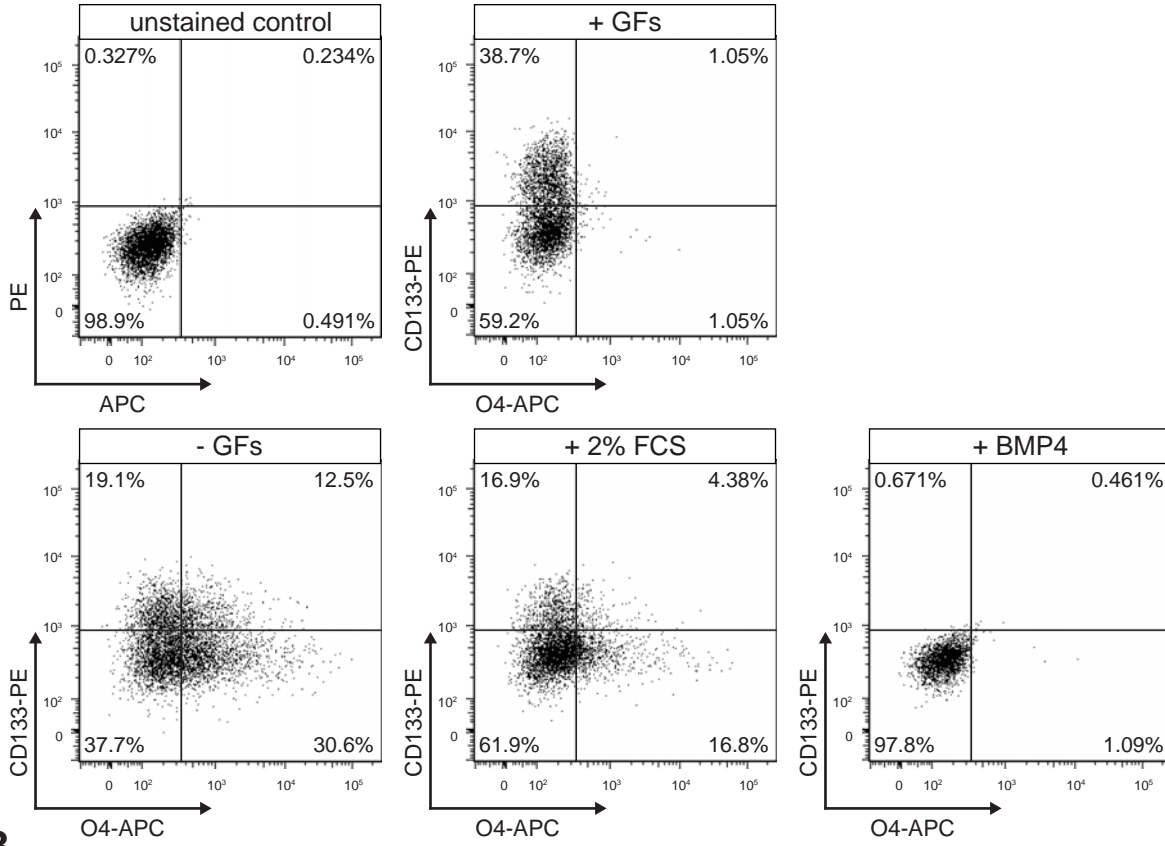

**B**

G073

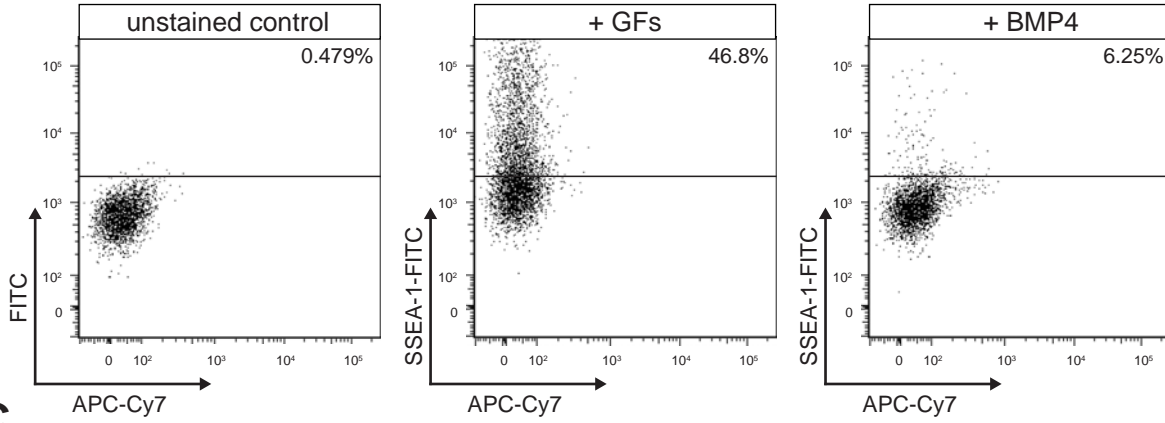

**C**

G062

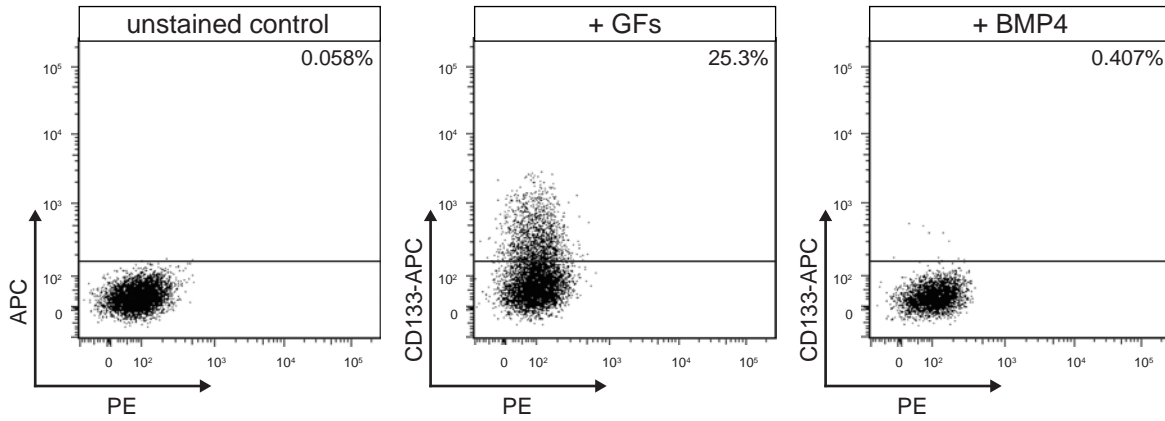

Supplement: 12943_2015_420_MOESM1_ESM.pdf [file 12943_2015_420_MOESM1_ESM.pdf]
